# Supplementary material
Source: MDPI journal article supplement (https://www.mdpi.com/2075-4701/8/5/327)
Supplement: s1 [file s1]

## Sheet: Table_S1
					Table S1. Main element composition of sampled solid materials.
					LOI % (1000 °C)	Al2O3 wt%	Fe2O3 wt%	SiO2 wt%	TiO2 wt%	CaO wt%	Na2O wt%	SUM wt%
1	SB standard		Input bauxite	DD-BX	12.8	60.62	19.59	2.17	2.9	0.86	-	98.94
2	SB HTS			ST-BX	14.28	56.54	19.79	2.33	2.64	3.78	-	99.36
3	Delphi-Distomon			HS-BX	12.88	61.4	20.04	1.04	2.91	0.5	-	98.77
4	Turkey			TU-BX	11.24	53.88	24.72	4.59	2.99	0.97	-	98.39
5	Trombetas			TR-BX	26.59	53.73	11.19	4.96	1.35	<0.01	-	97.82
6	Ghana			GH-BX	26.48	52.73	13.54	4.29	1.49	<0.01	-	98.53
7	Decalcitated bauxite			DC-BX	12.87	61.94	19.21	1.62	2.77	1.25	-	99.66
1	Boues sweetening DB4			DC-RE	17.85	52.04	12.88	3.14	2.26	9.67	-	97.84
2	Αιώρημα avant attaque		Intermediate	BF-DG	19.41	50.41	17.02	1.3	2.24	4.94	6.11	101.43
1	Hydrated alumina			SW-DS	24.82	46.67	13.22	4.82	1.69	1.09	5.32	97.63
2	Calcined alumina		Product / by-product	HY-AL	39.2*	60.8*	0.0104**	0.0037**	<0.0016**	0.0123**	-
3	Red mud			CA-AL	1.15***	98.4****	0.0115	0.0044	<0.0016	0.0018	0.361
4	Decalcitation residue			RM-FP	10.38	20.64	41.65	6.76	5.32	10.07	2.87	97.69
					* on wet hydrate basis
					** on calcined basis
					*** on dry basis
					**** calculated

## Sheet: Table_S2
				Table S2. Trace element composition of sampled solid materials. In bold are indicated the measurements used in mass balance calculation, if multiple options are available. Sign * refers to an alternative sub-sample and ** to a measurement from standardised XRF.
	Analyte	Method	Unit	Input bauxite								Intermediate/additives			Products/by-products
				Karst/ diasporic				Lateritic/gibbsitic		HMS unit
				DD-BX	ST-BX	HS-BX	TU-BX	TR-BX	GH-BX	DC-BX	DC-RE	BF-DG	SW-DS	CA-OX	HY-AL	CA-AL	RM-FP
	As	INAA	mg/kg	74.7 ± 5.5	160.0 ± 13.0	218 ± 17.0	64.0 ± 3.9	11.5 ± 0.3	26.6 ± 1.5	109.0 ± 8.0	98.9 ± 6.1	769	60.2 ± 4.1	4	< 0.5	< 0.5	238.0 ± 34
	As	ICP-MS	mg/kg	128 ± 5	122 ± 6	99 ± 2	70 ± 14	na	57 ± 3	111 ± 9*	77 ± 4	1007 ± 2	99 ± 23	na	< 61	< 12*	214 ± 34
	Ce	ICP-MS	mg/kg	208 ± 0	177 ± 2	177 ± 3	265 ± 4	< 10	29 ± 0	195 ± 0	137 ± 4	155 ± 0	47 ± 1	< 10	<10	< 2*	363 ± 6
	Ce	INAA	mg/kg	217 ± 8	177 ± 5	180 ± 4	267 ± 3	9 ± 0	34 ± 1	200 ± 5	118 ± 1	177	47 ± 3	< 3	< 3	< 3	377 ± 2
	Cr	ICP-MS	mg/kg	693 ± 64	588 ± 50	590 ± 51	442 ± 35	138	521 ± 5*	768 ± 10*	450 ± 50	658 ± 1	335 ± 11	na	< 64	na	1429 ± 97
	Dy	ICP-MS	mg/kg	10.2 ± 0.1	10.9 ± 0.9	< 10	22.2 ± 0.5	<10	5.6 ± 0.4*	8.6 ± 0.0*	8.2 ± 0.1	<10	<10	< 10	< 10	< 2*	16.9 ± 0.0*
	Er	ICP-MS	mg/kg	5.9 ± 0.4*	7.2 ± 0.8*	< 10	10.6 ± 0.2*	<10	3.8 ± 0.5*	5.6 ± 0.0*	5.5 ± 0.1	<10	<10	<10	< 10	< 2*	11.2 ± 0.1*
	Eu	ICP-MS	mg/kg	< 2*	2.4 ± 0.9*	< 10	4.2 ± 0.5*	< 10	< 2*	< 2*	< 2	< 10	< 10	< 10	< 10	< 2*	4.6 ± 1.1*
	Eu	INAA	mg/kg	2.7 ± 0.3	2.4 ± 0.4	1.4 ± 0.1	3.4 ± 0.3	0.5 ± 0.2	0.8 ± 0.2	2.0 ± 0.1	1.8 ± 0.2	1.3 ± 0.2	0.8 ± 0.3	< 0.2	< 0.2	< 0.2	4.0 ± 0.4
	Ga	ICP-MS	mg/kg	58 ± 0	60 ± 1	66 ± 1	69 ± 4	60 ± 1	57 ± 1	60 ± 0	55 ± 5	113 ± 7	93 ± 2	< 50	85 ± 1**	83 ± 0**	41 ± 0*
	Gd	ICP-MS	mg/kg	11.4 ± 0.1	10.8 ± 0.8	< 10	25.2 ± 1.2	< 10	< 10	8.5 ± 0.0*	9.1 ± 0.1	<10	< 10	< 10	< 10	< 2*	17.5 ± 0.0*
	Ho	ICP-MS	mg/kg	< 2*	2.2 ± 0.1*	< 10	3.2 ± 0.0*	<10	< 2*	< 2*	< 2	<10	<10	<10	< 10	< 2*	4.1 ± 0.1*
	La	ICP-MS	mg/kg	58 ± 1	63 ± 3	< 50	145 ± 15	< 50	< 50	67 ± 2	56 ± 5	51 ± 1	< 50	< 50	< 50	< 50	135 ± 1*
	La	INAA	mg/kg	51.3 ± 1.6	60.3 ± 2.4	46.7 ± 1.7	129.0 ± 1.0	5.0 ± 0.4	19.1 ± 1.3	46.6 ± 1.3	52.0 ± 0.2	44.2 ± 7.0	15.3 ± 0.8	2.5	< 0.5	< 0.5	104.0 ± 1
	Lu	ICP-MS	mg/kg	< 2*	< 2*	< 2*	< 2*	<10	< 2*	< 2*	< 2	<10	<10	<10	<10	< 2*	2.2 ± 0.0*
	Lu	INAA	mg/kg	1.26 ± 0.19	0.98 ± 0.01	0.92 ± 0.02	1.61 ± 0.01	0.37 ± 0.04	0.39 ± 0.00	0.95 ± 0.07	0.70 ± 0.07	0.78 ± 0.12	0.45 ± 0.01	< 0.05	< 0.05	< 0.05	1.90 ± 0.05
	Nd	ICP-MS	mg/kg	53.5 ± 3.8	53.8 ± 4.1	31.9 ± 0.4	92.3 ± 3.4	< 10	12.0 ± 0.1	42.5 ± 0.9	45.3 ± 0.3	38.9 ± 0.2	12.0 ± 0.0	< 10	< 10	< 10	86.5 ± 0.9
	Nd	INAA	mg/kg	42 ± 2	38 ± 5	23 ± 3	70 ± 0	< 5	13 ± 1	32 ± 0	55 ± 17	26	< 5	< 5	< 5	< 5	65 ± 2
	Pr	ICP-MS	mg/kg	13.2 ± 0.1	12.7 ± 0.5	< 10	23.1 ± 1.1	< 10	< 10	10.3 ± 0.1	12.1 ± 0.5	< 10	< 10	< 10	< 10	< 2*	21.7 ± 0.1
	Sc	INAA	mg/kg	53.7 ± 0.9	43.1 ± 0.7	43.1 ± 0.6	56.0 ± 0.8	7.1 ± 0.0	8.4 ± 0.2	50.0 ± 0.8	27.3 ± 0.3	41.5	14.9 ± 0.4	0.8	< 0.1	< 0.1	97.7 ± 0.1
	Sm	ICP-MS	mg/kg	11.1 ± 0.1	10.9 ± 0.9	< 10	20.1 ± 4.0	< 10	5.9 ± 0.0*	10.2	8.1 ± 0.1	< 10	< 10	< 10	< 10	< 2*	20.4 ± 2.6
	Sm	INAA	mg/kg	10.4 ± 0.9	8.7 ± 0.4	5.7 ± 0.6	17.2 ± 0.5	0.6 ± 0.1	2.0 ± 0.2	9.2 ± 0.0	9.1 ± 0.1	8.1 ± 0.4	2.2 ± 0.1	0.2	< 0.1	< 0.1	17.9 ± 1.0
	Tb	ICP-MS	mg/kg	< 2*	2.3 ± 0.5*	< 10	2.8 ± 0.0*	<10	< 2*	< 2*	< 2	<10	<10	< 10	< 10	< 2*	3.3 ± 0.0*
	Tb	INAA	mg/kg	< 0.5	< 0.5	< 0.5	< 0.5	< 0.5	< 0.5	< 0.5	< 0.5	< 0.5	< 0.5	< 0.5	< 0.5	< 0.5	< 0.5
	Tm	ICP-MS	mg/kg	< 2*	< 2*	< 2*	< 2*	<10	< 2*	< 2*	< 2	<10	<10	<10	<10	< 2*	< 2*
	V	ICP-MS	mg/kg	336 ± 2	537 ± 18	561 ± 24	412 ± 9	201 ± 5	221 ± 3	438 ± 0	325 ± 3	1794 ± 14	297 ± 1	64 ± 0	< 50	< 20*	1029 ± 5
	V	XRF-std	mg/kg	398	558	650	487	258	247	471	179	1983	359	na	< 10	< 10	1020
	Y	ICP-MS	mg/kg	47.5 ± 0.4	46.7 ± 0.8	46.1 ± 0.6	92.7 ± 2.7	11.4 ± 1.3	17.2 ± 0.3	44.8 ± 0.3	39.9 ± 1.7	38.3 ± 0.1	17.2 ± 0.4	< 10	< 10	< 10	89.5 ± 0.4*
	Yb	ICP-MS	mg/kg	6.2 ± 0.4*	7.0 ± 0.4*	< 10	11.4 ± 0.2*	<10	3.6 ± 0.3*	6.0 ± 0.0*	5.9 ± 0.1	<10	<10	<10	< 10	< 2*	12.6 ± 0.0*
	Yb	INAA	mg/kg	7.2 ± 0.7	6.1 ± 0.4	5.9 ± 0.4	11.5 ± 0.2	2.1 ± 0.3	2.5 ± 0.3	6.9 ± 0.6	5.4 ± 0.1	6.5 ± 0.4	2.7 ± 0.2	0.3	< 0.2	< 0.2	13.5 ± 0.0

## Sheet: Table_S3
	Table S3. Composition of Bayer liquors. Letters A-D refer to sample repetitions. In bold are indicated the measurements used in mass balance calculation, if multiple options are available.
	Analyte	Unit	Method	Repetition	Concentrated spent liquor	Pregnant liquor	Spent liquor	Preheating liquor fraction	Desilication liquor fraction
					CL	PL	SL	BF	SW
	Al2O3	g/l	titr.	A	143	188.3	115.3
	Al2O3	g/l	titr.	B	137.6	192.8	109.7
	Al2O3	g/l	titr.	C		192.3	105	125.4	51.3
	Al2O3	g/l	titr.	D	136.2	195.3	104.4
	Al2O3	g/l	titr.	A-D average	138.9	192.2	108.6
	Na2O	g/l	titr.	A	213.4	162.2	174.6
	Na2O	g/l	titr.	B	215.3	158.7	171.1
	Na2O	g/l	titr.	C		157.3	171.1	209.9	113.1
	Na2O	g/l	titr.	D	217.7	159.5	170.1
	Na2O	g/l	titr.	A-D average	215.5	159.4	171.7
	As	mg/l	XRF	D	181	146	129
	As	mg/l	INAA	D	131.6 ± 16.2	110.8 ± 5.4	99.6 ± 5.4
	Ba	mg/l	XRF	D	< 17	22	26
	Br	mg/l	XRF	D	53	43	35
	Br	mg/l	INAA	D	40.7 ± 0.0	33.6 ± 0.5	31.4 ± 0.8
	Ca	mg/l	AAS-1	A		14.9	16.5
	Ca	mg/l	AAS-1	C		0.9
	Ca	mg/l	XRF	D	32	64	49
	Ce	mg/l	ICP-MS	B	< 0.04	< 0.04	< 0.04
	Ce	mg/l	XRF	D	< 36	< 35	63
	Ce	mg/l	INAA	D	< 2	< 2	< 2
	Co	mg/l	XRF	D	< 1	< 1	< 1
	Cr	mg/l	AAS-2	A	1.7	1.5	< 0.3	< 0.3	< 0.3
	Cr	mg/l	ICP-MS	B	1.42	1.4	1.3
	Cr	mg/l	XRF	D	28	33	16
	Cs	mg/l	XRF	D	15	12	27
	Cs	mg/l	INAA	D	< 0.5	< 0.5	1.4 ± 1
	Cu	mg/l	XRF	D	2.2	0.8	0.4
	Eu	mg/l	INAA	D	< 0.1	< 0.1	< 0.1
	Fe	mg/l	UV	A		9.6	3.39
	Fe	mg/l	AAS-2	A	2.7	2.15	0.33
	Fe	mg/l	UV	C		9.2
	Fe	mg/l	XRF	D	54	70	43
	Ga	mg/l	ICP-OES	B	367	267.2	279.7
	Ga	mg/l	ICP-OES	C		303.2	300.4	295.3	216.1
	Ga	mg/l	ICP-OES	B-C average	367	285.2	290.05
	Ga	mg/l	XRF	D	> 281	> 253	> 208
	Gd	mg/l	ICP-MS	B	< 0.04	< 0.04	< 0.04
	Hf	mg/l	XRF	D	4	5	3
	Hg	mg/l	XRF	D	< 1	0.3	0.7
	Hg	mg/l	INAA	D	< 0.5	< 0.5	< 0.5
	I	mg/l	XRF	D	301	212	225
	In	mg/l	XRF	D	2	1	1
	K	g/l	AAS-nt	A	14.4	13.7	13.8
	La	mg/l	ICP-MS	B	< 0.04	< 0.04	< 0.04
	La	mg/l	XRF	D	< 26	33	19
	La	mg/l	INAA	D	< 0.3	< 0.3	< 0.3
	Lu	mg/l	INAA	D	< 0.03	< 0.03	< 0.03
	Mg	mg/l	AAS-2	A	< 0.1	< 0.1	< 0.1
	Mg	mg/kg	XRF	D	926	790	562
	Mn	mg/l	AAS-nt	A	1.05	1.05	0.15
	Mo	mg/l	XRF	D	622	471	438
	Mo	mg/l	INAA	D	394 ± 58	318 ± 26	273 ± 3.4
	Nb	mg/l	XRF	D	< 2	< 2	< 2
	Nd	mg/l	INAA	D	< 3	< 3	< 3
	Ni	mg/l	AAS-2	A	4.15	3.8	0.59
	Ni	mg/l	AAS-2	C		4.8	< 4	4.4	< 4
	Ni	mg/l	XRF	D	2	1	1
	Rb	mg/l	XRF	D	58	43	42
	Sb	mg/l	XRF	D	5	3	7
	Sc	mg/l	ICP-MS	B	0.4261	0.2751	0.2195
	Sc	mg/l	INAA	D	< 0.05	< 0.05	< 0.05
	Si	mg/l	AAS-1	A		544	520
	Si	mg/l	AAS-2	A	578.5	457	120.2
	Si	mg/l	XRF	D	448	1154	446
	Sm	mg/kg	INAA	D	< 0.05	< 0.05	< 0.05
	Sm	mg/l	INAA	D	< 0.05	< 0.05	< 0.05
	Sn	mg/l	XRF	D	< 3	< 3	< 2
	Zn	mg/l	AAS-nt	A	1	0.35	< 0.04
	Zn	mg/l	AAS-nt	C		< 0.8	< 0.8	0.8	1.4
	Zn	mg/l	XRF	D	4	8	2
	Zr	mg/l	XRF	D	1996	1957	1455
	Ta	mg/l	XRF	D	5	< 2	< 1
	Tb	mg/l	INAA	D	< 0.3	< 0.3	< 0.3
	Th	mg/l	XRF	D	2	2	1
	Th	mg/l	ICP-MS	B	< 0.2	< 0.2	< 0.2
	Th	mg/l	INAA	D	< 0.1	< 0.1	< 0.1
	Ti	mg/l	AAS	B	~1	~1	~1
	Ti	mg/l	XRF	D	< 3	< 3	< 3
	U	mg/l	ICP-MS	B	0.2254	1.28	1.27
	U	mg/l	XRF	D	< 1	< 1	< 1
	U	mg/l	INAA	D	0.4	0.3	0.4 ± 0.1
	V	mg/l	XRF-st	A		263	292
	V	mg/l	AAS-2	A	251.5	524.75	62.6
	V	mg/l	ICP-OES	B	426.1	304.4	329.1
	V	mg/l	ICP-OES	C		285.9	300.3	127.3	314.3
	V	mg/l	ICP-OES	B-C average	426.1	295.15	314.7
	V	mg/l	XRF	D	494	377	383
	W	mg/l	XRF	D	65	51	45
	W	mg/l	INAA	D	34 ± 1	27 ± 5	21 ± 1
	Y	mg/l	ICP-MS	B	< 0.04	< 0.04	< 0.04
	Y	mg/l	XRF	D	< 5	< 5	< 5
	Yb	mg/l	INAA	D	< 0.1	< 0.1	< 0.1
	Yb	g/l	XRF	D	18.2	14.2	11

## Sheet: Table_S4
		Table S4. Mass distribution of metals (and metalloids) that accumulate to process liquor. A combination of different analytical methods is used.
			Cr			As			V	Ga
		I HMS
	In:	B3 Standard	155	±	14	34	±	2	164	17	±	0
		B3 Delphi-Distomo	578	±	53	107	±	4	332	48	±	0
		sum	733			141			496	65
	Out:	B3 Mixed bauxite	734	±	10	106	±	9	450	57	±	0
		Decalc. residue	37	±	4	20	±	1	36	11	±	0
		sum	771			126			486	68
		difference	0.0518417			-0.106383			-0.0201613	0.0461538
		II Grinding, preheating of karst bauxite
	In:	B3 Mixed bauxite	734	±	10	106	±	9	450	57	±	0
		B3 Mixed from stock	429	±	6	62	±	5	263	33	±	0
		Turkish bauxite	45	±	4	7	±	1	49	7	±	0
		B2 bauxite	10	±	1	2	±	0	11	1	±	0
		Concentrated liquor	11			978	±	120	3168	2729
		sum	1229			1155			3941	2827
	Out:	Karst solid fraction	1234	±	2	1443			3366	212	±	13
		Karst liquid fraction	< 2.5			n/a			1052	2441
		sum	1234			1443			4418	2653
		difference	0.00406835			0.249351			0.121035	-0.0615493
		III Grinding, desilication of lateritic bauxite
	In:	Lateritic bauxite	60	±	1	5	±	0	112	26	±	1
		Spent liquor	0.3			24	±	1	75	67
		sum	60.3			29			187	93
	Out:	Later. solid fraction	123	±	4	22	±	2	109	34	±	1
		Later liquid fraction	< 0.1			n/a			101	69
		sum	123			22			210	103
		difference	1.0398			-0.241379			0.122995	0.107527
		IV Digestion, settling, washing
	In:	Karst solid fraction	1234	±	2	1443			3366	212	±	13
		Karst liquid fraction	< 2.5			n/a			1052	2441
		Later. solid fraction	123	±	4	22	±	2	109	34	±	1
		Later liquid fraction	< 0.1			n/a			101	69
		Lime	< 0.3			0.3			4	< 3
		sum	1357			1465.3			4632	2756
	Out:	Bauxite residue	1265	±	86	189	±	30	903	36	±	5
		Pregnant liquor	15.6			1236	±	60	3292	2981
		sum	1280.6			1425			4195	3017
		difference	-0.0563007			-0.0275029			-0.0943437	0.0947025
		V Precipitation
	In:	Pregnant liquor	15.6			1236	±	60	3292	2981
	Out:	Aluminium hydrox.	< 5			< 0.5			< 10	85	±	1
		Spent liquor to evap.	13.2			1012	±	51	3199	2843
		Spent liquor to later.	0.3			24	±	1	75	67
		sum	13.5			1036			3274	2995
		difference	-0.134615			-0.161812			-0.0054678	0.00469641
		VI Evaporation
	In:	Spent liquor	13.2			1012	±	51	3199	2843
	Out:	Concentrated liquor	10.6			978	±	50	3168	2729
		difference	-0.19697			-0.0335968			-0.00969053	-0.0400985
		VII Calcination
	In:	Aluminium hydrox.	< 5			< 0.5			< 10	85	±	1
	Out:	Calcined alumina	< 4			< 0.4			< 8	67	±	0
		Aluminium hydrox.	< 1			< 0.1			< 2	16	±	0
		sum								83
		difference								-0.0235294
		Internal balance
	In:	Karst bauxite	1218	±	16	177	±	14	773	99	±	0
		Lateritic bauxite	60	±	1	5	±	0	112	26	±	1
		Digestion liquors	10.9			1002	±	122	3243	2796	±
		Lime	< 0.3			0.3			4	< 3
		sum	1288.9			1184.3			4132	2921
	Out:	Aluminium hydrox.	< 5			< 0.5			< 10	85	±	1
		Spent liquor	13.5			1036	±	51	3274	2910
		Bauxite residue	1265	±	86	189		30	903	36	±	5
		sum	1278.5			1225			4177	3031
		difference	-0.0080689			0.0343663			0.0108906	0.0376583
	In:	External balance
		Karst bauxite	1218	±	16	177	±	14	774	99	±	0
		Lateritic bauxite	60	±	1	5	±	0	112	26	±	1
		Lime	< 0.3			0.3			4	< 3
		sum	1278			182.3			890	125
	Out:	Aluminium hydrox.	< 5			< 0.5			< 10	85	±	1
		Bauxite residue	1265	±	86	189	±	30	903	36	±	5
		sum	1265			189			903	121
		difference	-0.0101721			0.0367526			0.0146067	-0.032

## Sheet: Table_S5
			Table S5. Mass distribution of trace elements that do not accumulate to process liquors, based on ICP-MS data.
			Ce			La			Pr			Nd			Y			Sm			Gd			Dy			Er			Yb
		I HMS
	In:	B3 Standard	49	±	1	18	±	1	3.5	±	0.1	15	±	1.1	13	±	0.2	3	±	0.3	3	±	0.2	3	±	0.3	2	±	0.2	1.9	±	0.1
		B3 Delphi-Distomo	174	±	0	48	±	1	11	±	0.1	44.7	±	3.2	39.6	±	0.3	9.3	±	0.1	9.5	±	0.1	8.5	±	0.1	4.9	±	0.3	5.2	±	0.3
		sum	223			66			14.5			59.7			52.6			12.3			12.5			11.5			6.9			7.1
	Out:	B3 Mixed bauxite	186	±	0	64	±	2	9.8	±	0.2	40.6	±	0.9	42.8	±	0.3	9.8	±	0	8.1	±	0	8.2	±	0	5.4	±	0	5.7	±	0
		Decalc. residue	27	±	1	11	±	1	2.4	±	0.1	9.1	±	0.1	8	±	0.3	1.6	±	0	1.8	±	0	1.6	±	0	1.1	±	0	1.2	±	0
		sum	213			75			12.2			49.7			50.8			11.4			9.9			9.8			6.5			6.9
		difference	-0.044843			0.136364			-0.158621			-0.167504			-0.0342205			-0.0731707			-0.208			-0.147826			-0.057971			-0.028169
		II Grinding, preheating of karst bauxite
	In:	B3 Mixed bauxite	186	±	0	64	±	2	9.8	±	0.2	40.6	±	0.9	42.8	±	0.3	9.8	±	0	8.1	±	0	8.2	±	0	5.4	±	0	5.7	±	0
		B3 Mixed from stock	109	±	0	37	±	0	5.7	±	0	23.7	±	0.5	25	±	0.2	5.7	±	0	4.7	±	0	4.8	±	0	3.1	±	0	3.3	±	0
		Turkish bauxite	27	±	0	15	±	2	2.3	±	0.1	9.3	±	0.3	9.3	±	0.3	2	±	0.4	2.5	±	0.1	2.2	±	0.1	1.1	±	0	1.1	±	0
		B2 bauxite	3	±	0	1	±	0	< 0.2			0.6	±	0	0.8	±	0	0.1	±	0	< 0.2			< 0.2			< 0.2			0.1	±	0
		Concentrated liquor	< 0.3			< 0.3			n/a			< 22			< 0.3			< 0.4			< 0.3			n/a			n/a			< 1.5
		sum	325			117			17.8			74.2			77.9			17.6			15.3			15.2			9.6			10.2
	Out:	Karst solid fraction	291	±	2	97	±	2	< 18.8			73.2	±	0.4	71.9			15.2			< 18.8			< 18.8			< 18.8			12.2	±	1.1
		Karst liquid fraction	n/a			n/a			n/a			n/a			n/a			n/a			n/a			n/a			n/a			n/a
		sum	291			97						73.2			71.9			15.2												12.2
		difference	-0.104615			-0.17094						-0.0134771			-0.0770218			-0.136364												0.196078
		III Grinding, desilication of lateritic bauxite
	In:	Lateritic bauxite	4	±	1	2	±	0	< 4.3			< 4.3			4.9	±	0.6	0.3	±	0	< 4.3			< 4.3			< 4.3			0.9	±	0.1
		Spent liquor	< 0.01			< 0.01			n/a			< 0.01			< 0.01			< 0.01			< 0.01			n/a			n/a			< 0.04
		sum	4			2									4.9			0.3												0.9
	Out:	Later. solid fraction	17	±	0	6	±	0	< 3.7			4.4	±	0	6.3	±	0.1	0.8	±	0	< 3.7			< 3.7			< 3.7			1	±	0.1
		Later liquid fraction	n/a			n/a			n/a			n/a			n/a			n/a			n/a			n/a			n/a			n/a
		sum	17			6						4.4			6.3			0.8												1
		difference	3.25			2									0.285714			1.66667												0.111111
		IV Digestion, settling, washing
	In:	Karst solid fraction	291	±	0	96	±	2	< 18.8	±	0	73.2	±	0.4	71.9	±	0.2	15.2	±	0.8	< 18.8			< 18.8			< 18.8			12.2	±	1.1
		Karst liquid fraction	n/a			n/a			n/a			n/a			n/a			n/a			n/a			n/a			n/a			n/a
		Later. solid fraction	17	±	0	6	±	0	< 3.7			4.4	±	0	6.3	±	0.1	0.8	±	0	< 3.7			< 3.7			< 3.7			1	±	0.1
		Later liquid fraction	n/a			n/a			n/a			n/a			n/a			n/a			n/a			n/a			n/a			n/a
		Lime	< 0.2			0.2			< 0.7			< 0.3			< 0.7			0.01			< 0.7			< 0.7			< 0.7			0.02
		sum	308			102.2						77.6			78.2			16.01												13.22
	Out:	Bauxite residue	321	±	5	120	±	1	19.2	±	0.1	76.6	±	0.8	79.2	±	1.3	18.1	±	2.3	15.5	±	0	15	±	0	9.9	±	0.1	11.2	±	0.3
		Pregnant liquor	< 0.4			< 0.4			n/a			< 33			< 0.4			< 0.6			< 0.4			n/a			n/a			< 2.2
		sum	321			120						76.6			79.2			18.1			15.5			15			9.9			11.2
		difference	0.0422078			0.174168						-0.0128866			0.0127877			0.130543												-0.152799
	In:	External balance
		Karst bauxite	325	±	1	117	±	3	17.8	±	0.2	74.2	±	1.4	77.9	±	0.5	17.6	±	0.4	15.3	±	0.1	15.2	±	0.1	9.7	±	0	10.2	±	0
		Lateritic bauxite	4	±	0	2	±	0	< 4.3			< 4.3			4.9	±	0.6	0.3	±	0	< 4.3			< 4.3			< 4.3			0.9	±	0.1
		Lime	< 0.2			0.2			< 0.7			< 0.3			< 0.7			0.01			< 0.7			< 0.7			< 0.7			0.02
		sum	329			119.2			17.8			74.2			82.8			17.91			15.3			15.2			9.7			11.12
	Out:	Aluminium hydrox.	< 3			< 0.5			< 10			< 5			< 10			< 0.1			< 10			< 10			< 10			< 0.3
		Bauxite residue	321	±	5	120	±	1	19.2	±	0.1	76.6	±	1	79.2	±	1.3	18.1	±	2.3	15.5	±	0	15	±	0	9.9	±	0.1	11.2	±	0.3
		sum	321			120			19.2			76.6			79.2			18.1			15.5			15			9.9			11.2
		difference	-0.0243161			0.00671141			0.0786517			0.032345			-0.0434783			0.0106086			0.0130719			-0.0131579			0.0206186			0.00719424

## Sheet: Table_S6
			Table S6. Mass distribution of trace elements that do not accumulate to process liquors, based on INAA data.
			Sc			Ce			La			Nd			Sm			Eu			Yb			Lu
		I HMS
	In:	B3 Standard	12	±	0.2	49	±	1	16.8	±	0.7	11	±	1	2.4	±	0.1	0.7	±	0.1	1.7	±	0.1	0.27	±	0
		B3 Delphi-Distomo	44.8	±	0.8	181	±	7	42.8	±	1.3	35	±	2	8.7	±	0.8	2.3	±	0.3	6	±	0.6	1.05	±	0.16
		sum	56.8			230			59.6			46			11.1			3			7.7			1.32
	Out:	B3 Mixed bauxite	47.8	±	0.8	191	±	5	43	±	2.7	31	±	0	8.8	±	0	1.9	±	0.1	6.6	±	0.6	0.91	±	0.07
		Decalc. residue	5.5	±	0.1	24	±	0	10.4	±	0	11	±	3	1.8	±	0	0.4	±	0	1.1	±	0	0.14	±	0.01
		sum	53.3			215			53.4			42			10.6			2.3			7.7			1.05
		difference	-0.0616197			-0.0652174			-0.104027			-0.0869565			-0.045045			-0.233333			-1.15348e-16			-0.204545
		II Grinding, preheating of karst bauxite
	In:	B3 Mixed bauxite	47.8	±	0.8	191	±	5	43	±	2.7	31	±	0	8.8	±	0	1.9	±	0.1	6.6	±	0.6	0.91	±	0.07
		B3 Mixed from stock	27.9	±	0.4	112	±	3	27.5	±	1.7	18	±	0	5.1	±	0	1.1	±	0.1	3.9	±	0.4	0.53	±	0.04
		Turkish bauxite	5.6	±	0.1	27	±	0	13	±	0.1	7	±	0	1.7	±	0.1	0.3	±	0	1.2	±	0	0.16	±	0
		B2 bauxite	0.8	±	0	3	±	0	0.8	±	0	0	±	0	0.1	±	0	0.02	±	0	0.1	±	0	0.02	±	0
		Concentrated liquor	< 0.4			< 0.2			< 0.3			< 22			< 0.4			< 0.7			< 0.7			< 0.22
		sum	82.1			333			84.3			56			15.7			3.32			11.8			1.62
	Out:	Karst solid fraction	77.9	±	0	332	±	0	82.9	±	13.1	49			15.2	±	0.8	2.4	±	0.4	12.2	±	0.8	1.46	±	0.23
		Karst liquid fraction	n/a			n/a			n/a						n/a			n/a			n/a			n/a
		sum	77.9			332			82.9			49			15.2			2.4			12.2			1.46
		difference	-0.0511571			-0.003003			-0.0166074			-0.125			-0.0318471			-0.277108			0.0338983			-0.0987654
		III Grinding, desilication of lateritic bauxite
	In:	Lateritic bauxite	3.1	±	0	4	±	0	2.2	±	0.2	< 2			0.3	±	0	0.2	±	0.1	0.9	±	0.1	0.16	±	0.02
		Spent liquor	< 0.01			< 0.01			< 0.01			< 0.01			< 0.01			< 0.02			< 0.02			< 0.01
		sum	3.1			4			2.2						0.3			0.2			0.9			0.16
	Out:	Later. solid fraction	5.5	±	0.1	17	±	1	5.6	±	0.3	< 2			0.8	±	0	0.3	±	0.1	1	±	0.1	0.16	±	0
		Later liquid fraction	n/a			n/a			n/a			n/a			n/a			n/a			n/a			n/a
		sum	5.5			17			5.6						0.8			0.3			1			0.16
		difference	0.774194			3.25			1.54545						1.66667			0.5			0.111111			0
		IV Digestion, settling, washing
	In:	Karst solid fraction	77.9	±	0	332	±	0	82.9	±	13.1	49	±	0	15.2	±	0.8	2.4	±	0.4	12.2	±	0.8	1.46	±	0.23
		Karst liquid fraction	n/a			n/a			n/a			n/a			n/a			n/a			n/a			n/a
		Later. solid fraction	5.5	±	0.1	17	±	1	5.6	±	0.3	< 2	±		0.8	±	0	0.3	±	0.1	1	±	0.1	0.16	±	0
		Later liquid fraction	n/a			n/a			n/a			n/a			n/a			n/a			n/a			n/a
		Lime	0.1			< 0.2			0.2			< 0.3			0.01			< 0.01			0.02			< 0.003
		sum	83.5			349			88.7			49			16.01			2.7			13.22			1.62
	Out:	Bauxite residue	86.5	±	0.1	334	±	2	92.1	±	0.9	58	±	2	15.8	±	0.9	3.5	±	0.4	12	±	0	1.68	±	0.04
		Pregnant liquor	< 0.6			< 0.4			< 0.4						< 0.6			< 1.1			< 1.1			< 0.33
		sum	86.5			334			92.1			58			15.8			3.5			12			1.68
		difference	0.0359281			-0.0429799			0.0383315			0.183673			-0.0131168			0.296296			-0.0922844			0.037037
	In:	External balance
		Karst bauxite	82.1	±	1.2	333	±	8	84.3	±	2	56	±	0	15.7	±	0.1	3.32	±	0.2	11.8	±	0.9	1.62	±	0.1
		Lateritic bauxite	3.1	±	0	4	±	0	2.2	±	0.2	< 2			0.3	±	0	0.2	±	0.1	0.9	±	0.1	0.16	±	0
		Lime	0.1			< 0.2			0.2			< 0.3			0.01			< 0.01			0.02			< 0.003
		sum	85.3			337			86.7			56			16.01			3.52			12.72			1.78
	Out:	Aluminium hydrox.	< 0.1			< 3			< 0.5			< 5			< 0.1			< 0.2			< 0.2			< 0.05
		Bauxite residue	86.5	±	0.5	334	±	2	92.1	±	0.9	58	±	2	15.8	±	0.9	3.5	±	0.4	12	±	0	1.68	±	0
		sum	86.5			334			92.1			58			15.8			3.5			12			1.68
		difference	0.014068			-0.00890208			0.0622837			0.0357143			-0.0131168			-0.00568182			-0.0566038			-0.0561798
